# Supplementary material
Source: PubMed Central journal article supplement (PMC6136038)
Supplement: jamaophthalmol-136-738-s001.pdf [file jamaophthalmol-136-738-s001.pdf]

## Supplementary Online Content

Wu AM, Wu CM, Tseng VL, et al. Characteristics associated with receiving cataract surgery in the US Medicare and Veterans Health Administration populations. *JAMA Ophthalmol*. Published online May 2, 2018. doi:10.1001/jamaophthalmol.2018.1361

**eAppendix.** List of States in Each Region Grouped by US Census Divisions

This supplementary material has been provided by the authors to give readers additional information about their work.

**eAppendix.** List of States in Each Region Grouped by US Census Divisions

**East**

Division 1: New England (Connecticut, Maine, Massachusetts, New Hampshire, Rhode Island, and Vermont)

Division 2: Mid-Atlantic (New Jersey, New York, and Pennsylvania)

Division 5: South Atlantic (Delaware, Florida, Georgia, Maryland, North Carolina, South Carolina, Virginia, District of Columbia, and West Virginia)

**West**

Division 8: Mountain (Arizona, Colorado, Idaho, Montana, Nevada, New Mexico, Utah, and Wyoming)

Division 9: Pacific (Alaska, California, Hawaii, Oregon, and Washington)

**Midwest**

Division 3: East North Central (Illinois, Indiana, Michigan, Ohio, and Wisconsin)

Division 4: West North Central (Iowa, Kansas, Minnesota, Missouri, Nebraska, North Dakota, and South Dakota)

**South**

Division 6: East South Central (Alabama, Kentucky, Mississippi, and Tennessee)

Division 7: West South Central (Arkansas, Louisiana, Oklahoma, and Texas)

**Excluded**

Outliers

Foreign Countries

Unknown
